# Supplementary material for: Effectiveness of mHealth Interventions Targeting Health Care Workers to Improve Pregnancy Outcomes in Low- and Middle-Income Countries: A Systematic Review
Source: PubMed Central journal article supplement (PMC5010646; doi:10.2196/jmir.5533), 2016-08-19
Supplement: jmir_v18i8e226_app3.pdf [file jmir_v18i8e226_app3.pdf]

### Supplement 3: Adapted quality assessment tool

| Risk category                                          | Low risk                                                                                                                                                                                | High risk                                                                                                                                                                                                                          | Unclear risk                                                                                                                                                                      |
|--------------------------------------------------------|-----------------------------------------------------------------------------------------------------------------------------------------------------------------------------------------|------------------------------------------------------------------------------------------------------------------------------------------------------------------------------------------------------------------------------------|-----------------------------------------------------------------------------------------------------------------------------------------------------------------------------------|
| <b>Blinding: (detection bias)</b>                      | <ul style="list-style-type: none"> <li>No blinding or incomplete blinding, but the review authors judge that the outcome is not likely to be influenced by lack of blinding;</li> </ul> | <ul style="list-style-type: none"> <li>No blinding or incomplete blinding, and the outcome is likely to be influenced by lack of blinding;</li> </ul>                                                                              | <ul style="list-style-type: none"> <li>Insufficient information to permit judgment of 'Low risk' or 'High risk';</li> </ul>                                                       |
|                                                        | <ul style="list-style-type: none"> <li>Blinding of participants and key study personnel ensured, and unlikely that the blinding could have been broken.</li> </ul>                      | <ul style="list-style-type: none"> <li>Blinding of key study participants and personnel attempted, but likely that the blinding could have been broken, and the outcome is likely to be influenced by lack of blinding.</li> </ul> | <ul style="list-style-type: none"> <li>The study did not address this outcome.</li> </ul>                                                                                         |
|                                                        |                                                                                                                                                                                         |                                                                                                                                                                                                                                    |                                                                                                                                                                                   |
| <b>Selection of study population: (selection bias)</b> | <ul style="list-style-type: none"> <li>The individuals selected to participate are representative of the target population</li> </ul>                                                   | <ul style="list-style-type: none"> <li>The individuals selected to participate are somewhat likely/not likely to be representative of the target population</li> </ul>                                                             | <ul style="list-style-type: none"> <li>Not described whether individuals selected to participate in the study are likely to be representative of the target population</li> </ul> |
|                                                        | <ul style="list-style-type: none"> <li>The investigators describe a random component in the sequence generation process</li> </ul>                                                      | <ul style="list-style-type: none"> <li>The investigators describe a non-random component in the sequence generation process.</li> </ul>                                                                                            | <ul style="list-style-type: none"> <li>Insufficient information about the sequence generation process to permit judgement of 'Yes' or 'No'.</li> </ul>                            |
| <b>Case-control specific:</b>                          | <ul style="list-style-type: none"> <li>Case definition is adequate with independent validation</li> </ul>                                                                               | <ul style="list-style-type: none"> <li>Case definition is adequate, e.g. record linkage or based on self-reports</li> </ul>                                                                                                        | <ul style="list-style-type: none"> <li>No description of the case definition</li> </ul>                                                                                           |
|                                                        | <ul style="list-style-type: none"> <li>Consecutive or obviously representative series of cases</li> </ul>                                                                               | <ul style="list-style-type: none"> <li>Potential for selection biases</li> </ul>                                                                                                                                                   | <ul style="list-style-type: none"> <li>Representativeness of cases not stated</li> </ul>                                                                                          |
|                                                        | <ul style="list-style-type: none"> <li>Selection of controls occurred from community controls with no history of disease</li> </ul>                                                     | <ul style="list-style-type: none"> <li>Controls are hospital controls</li> </ul>                                                                                                                                                   | <ul style="list-style-type: none"> <li>There is no description of the controls</li> </ul>                                                                                         |
| <b>Cohort specific:</b>                                | <ul style="list-style-type: none"> <li>Representativeness of the exposed cohort is truly representative of the average ...(describe) in the community</li> </ul>                        | <ul style="list-style-type: none"> <li>Representativeness of the exposed cohort is somewhat representative of the average ...(describe) in the community</li> </ul>                                                                | <ul style="list-style-type: none"> <li>There is no description of the derivation of the cohort</li> </ul>                                                                         |
|                                                        | <ul style="list-style-type: none"> <li>The non-exposed cohort is drawn from the same community as the exposed cohort</li> </ul>                                                         | <ul style="list-style-type: none"> <li>The non-exposed cohort is drawn from a different source</li> </ul>                                                                                                                          | <ul style="list-style-type: none"> <li>There is no description of the derivation of the non-exposed cohort</li> </ul>                                                             |
|                                                        |                                                                                                                                                                                         |                                                                                                                                                                                                                                    |                                                                                                                                                                                   |

|                                       |                                                                                                                                                                                                                                                                 |                                                                                                                                                                                                                                                           |                                                                                                                                                                                                                               |
|---------------------------------------|-----------------------------------------------------------------------------------------------------------------------------------------------------------------------------------------------------------------------------------------------------------------|-----------------------------------------------------------------------------------------------------------------------------------------------------------------------------------------------------------------------------------------------------------|-------------------------------------------------------------------------------------------------------------------------------------------------------------------------------------------------------------------------------|
| <b>Completeness: (attrition bias)</b> | <ul style="list-style-type: none"> <li>•No missing outcome data;</li> </ul>                                                                                                                                                                                     | <ul style="list-style-type: none"> <li>•Reason for missing outcome data likely to be related to true outcome, with either imbalance in numbers or reasons for missing data across intervention groups;</li> </ul>                                         | <ul style="list-style-type: none"> <li>•Insufficient reporting of attrition/exclusions to permit judgement of 'Low risk' or 'High risk' (e.g. number randomized not stated, no reasons for missing data provided);</li> </ul> |
|                                       | <ul style="list-style-type: none"> <li>•Reasons for missing outcome data unlikely to be related to true outcome (for survival data, censoring unlikely to be introducing bias);</li> </ul>                                                                      | <ul style="list-style-type: none"> <li>•For dichotomous outcome data, the proportion of missing outcomes compared with observed event risk enough to induce clinically relevant bias in intervention effect estimate;</li> </ul>                          | <ul style="list-style-type: none"> <li>•The study did not address this outcome</li> </ul>                                                                                                                                     |
|                                       | <ul style="list-style-type: none"> <li>•Missing outcome data balanced in numbers across intervention groups, with similar reasons for missing data across groups;</li> </ul>                                                                                    | <ul style="list-style-type: none"> <li>•For continuous outcome data, plausible effect size (difference in means or standardized difference in means) among missing outcomes enough to induce clinically relevant bias in observed effect size;</li> </ul> |                                                                                                                                                                                                                               |
|                                       | <ul style="list-style-type: none"> <li>•For dichotomous outcome data, the proportion of missing outcomes compared with observed event risk not enough to have a clinically relevant impact on the intervention effect estimate;</li> </ul>                      | <ul style="list-style-type: none"> <li>•'As-treated' analysis done with substantial departure of the intervention received from that assigned at randomization;</li> </ul>                                                                                |                                                                                                                                                                                                                               |
|                                       | <ul style="list-style-type: none"> <li>•For continuous outcome data, plausible effect size (difference in means or standardized difference in means) among missing outcomes not enough to have a clinically relevant impact on observed effect size;</li> </ul> | <ul style="list-style-type: none"> <li>•Potentially inappropriate application of simple imputation</li> </ul>                                                                                                                                             |                                                                                                                                                                                                                               |
|                                       | <ul style="list-style-type: none"> <li>•Missing data have been imputed using appropriate methods</li> </ul>                                                                                                                                                     | <ul style="list-style-type: none"> <li>•Lost to follow up is mentioned but there is a large size variation between the patient and control group.</li> </ul>                                                                                              |                                                                                                                                                                                                                               |
|                                       | <ul style="list-style-type: none"> <li>•Lost to follow up is mentioned and is comparable within the patient as well as the control group.</li> </ul>                                                                                                            |                                                                                                                                                                                                                                                           |                                                                                                                                                                                                                               |
| <b>Case-control specific:</b>         | <ul style="list-style-type: none"> <li>•Non-response rate was same rate for both groups</li> </ul>                                                                                                                                                              | <ul style="list-style-type: none"> <li>•Non respondents described</li> </ul>                                                                                                                                                                              | <ul style="list-style-type: none"> <li>•Non-response rate different and no designation</li> </ul>                                                                                                                             |
|                                       |                                                                                                                                                                                                                                                                 |                                                                                                                                                                                                                                                           |                                                                                                                                                                                                                               |
| <b>Origin:</b>                        | <ul style="list-style-type: none"> <li>•Self-measurements or data was gathered by adequate personnel (midwife, research assistant etc.)</li> </ul>                                                                                                              | <ul style="list-style-type: none"> <li>•Data from database (not collected by researches themselves)</li> </ul>                                                                                                                                            | <ul style="list-style-type: none"> <li>•Article does not describe where data came from.</li> </ul>                                                                                                                            |
| <b>Cohort specific:</b>               | <ul style="list-style-type: none"> <li>•Assessment of outcome occurred through independent blind assessment and/or record linkage</li> </ul>                                                                                                                    | <ul style="list-style-type: none"> <li>•Assessment of outcome occurred through self-report</li> </ul>                                                                                                                                                     | <ul style="list-style-type: none"> <li>•No description of assessment of outcome</li> </ul>                                                                                                                                    |
|                                       |                                                                                                                                                                                                                                                                 |                                                                                                                                                                                                                                                           |                                                                                                                                                                                                                               |
| <b>Definition of outcome:</b>         | <ul style="list-style-type: none"> <li>•Article gives adequate definitions of outcome measurements</li> </ul>                                                                                                                                                   | <ul style="list-style-type: none"> <li>•Article does not give adequate definitions of outcome measurements</li> </ul>                                                                                                                                     | <ul style="list-style-type: none"> <li>•Article does not give adequate definitions for ALL outcome measurements</li> </ul>                                                                                                    |

|                     |                                                                                                                                       |                                                                                                                 |                                                                                                                                                                                                                                 |
|---------------------|---------------------------------------------------------------------------------------------------------------------------------------|-----------------------------------------------------------------------------------------------------------------|---------------------------------------------------------------------------------------------------------------------------------------------------------------------------------------------------------------------------------|
|                     |                                                                                                                                       |                                                                                                                 |                                                                                                                                                                                                                                 |
| <b>Confounders:</b> | <ul style="list-style-type: none"> <li>•Article states that confounders were taken into account and define the confounders</li> </ul> | <ul style="list-style-type: none"> <li>•Article states that confounders were not taken into account.</li> </ul> | <ul style="list-style-type: none"> <li>•Article only states that confounders were taken into account, but no specific confounders are given</li> <li>•Article does not state that confounders are taken into account</li> </ul> |
